# Supplementary material for: Pirfenidone controls the feedback loop of the AT1R/p38 MAPK/renin-angiotensin system axis by regulating liver X receptor-α in myocardial infarction-induced cardiac fibrosis
Source: PubMed Central journal article supplement (PMC5238375; doi:10.1038/srep40523), 2017-01-16

## Supplementary information

**The manuscript title:** Pirfenidone controls the feedback loop of the AT1R/p38 MAPK/renin-angiotensin system axis by regulating liver X receptor- $\alpha$  in myocardial infarction-induced cardiac fibrosis

**Author list:** Chunmei Li, Rui Han, Le Kang, Jianping Wang, Yonglin Gao, Yanshen Li, Jie He, Jingwei Tian

**Supplementary legends:** C, Control; M, Model; L, Losartan; B, Pirfenidone

### 1. The full-length gels: Fig.6-Collagen I

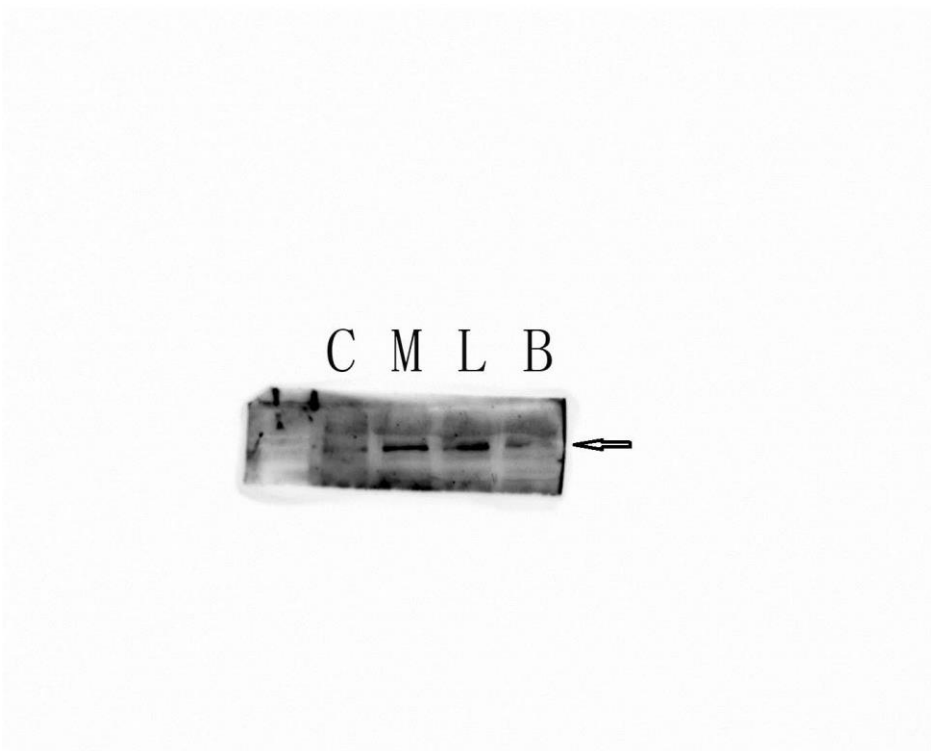

**2. The full-length gels: Fig.6-Collagen III**

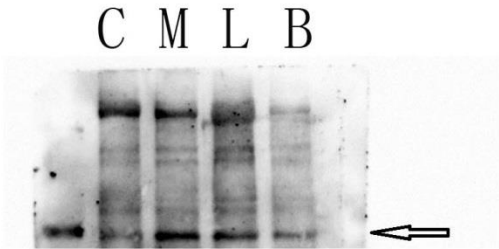

**3. The full-length gels: Fig.6-Collagen 1 and 3 ( $\beta$ -actin)**

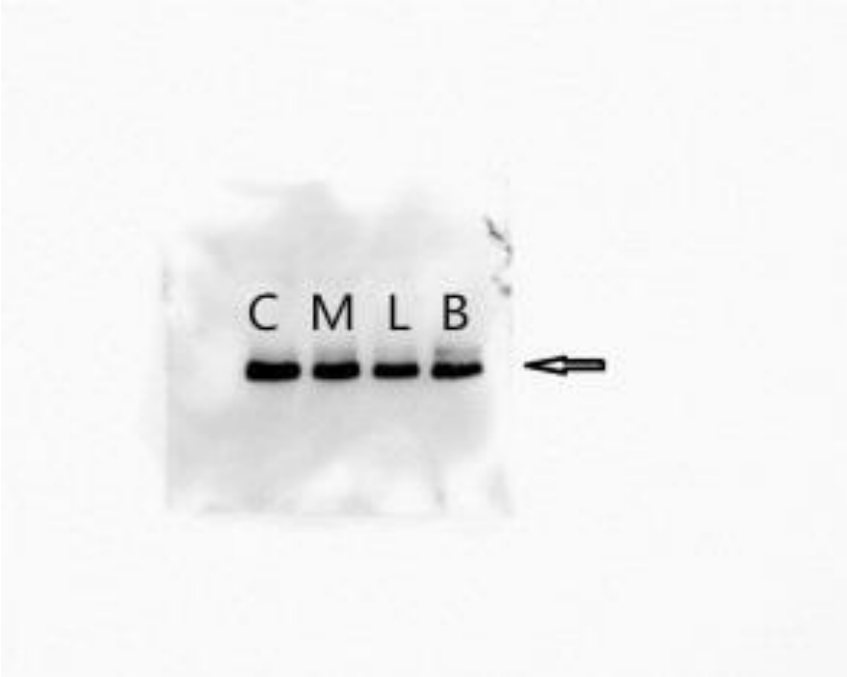

4. The full-length gels: Fig.7- $\alpha$ -SMA

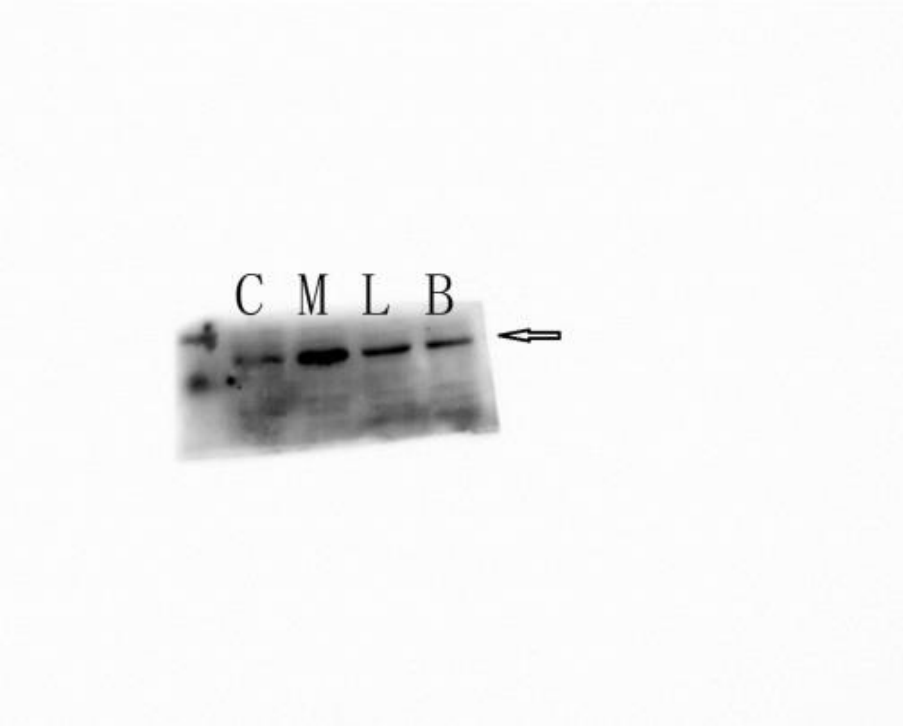

5. The full-length gels: Fig.7- $\alpha$ -SMA ( $\beta$ -actin)

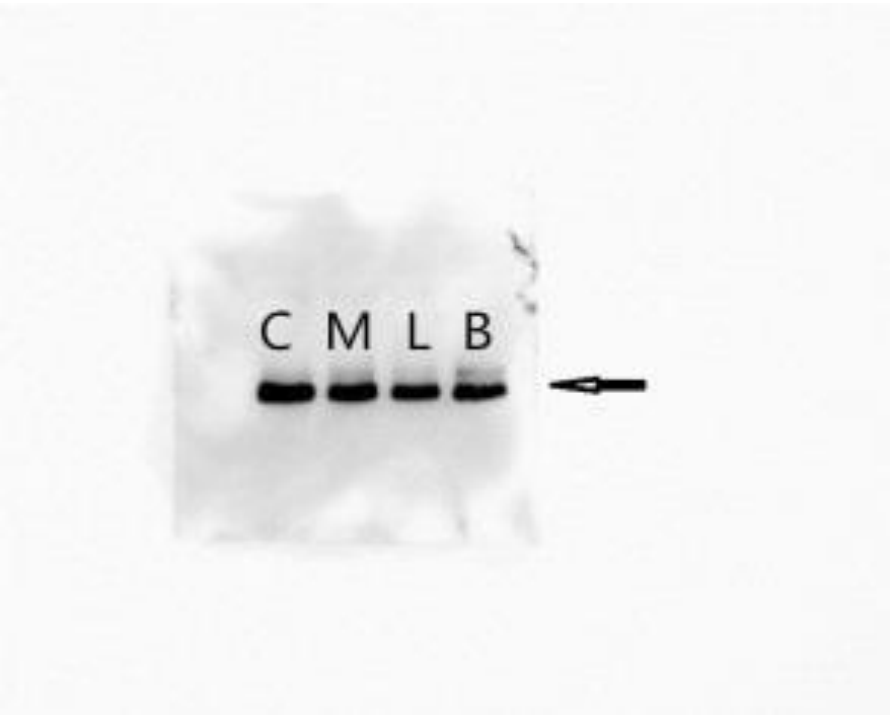

**6. The full-length gels: Fig.9-AT1R**

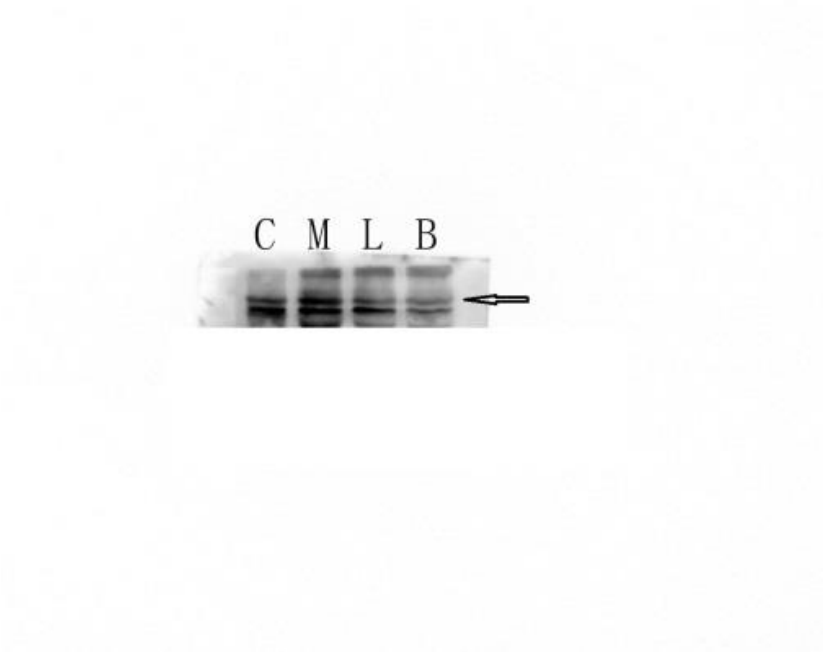

**7. The full-length gels: Fig.9-AT1R( $\beta$ -actin)**

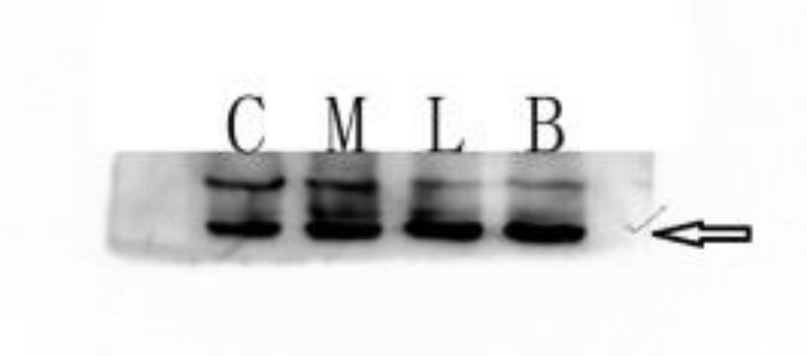

**8. The full-length gels: Fig.9-P-p38**

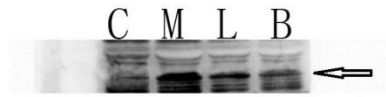

**9. The full-length gels: Fig.9-T-p38**

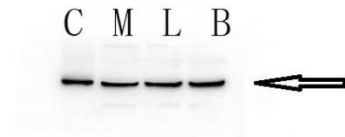

**10. The full-length gels: Fig.10-ACE**

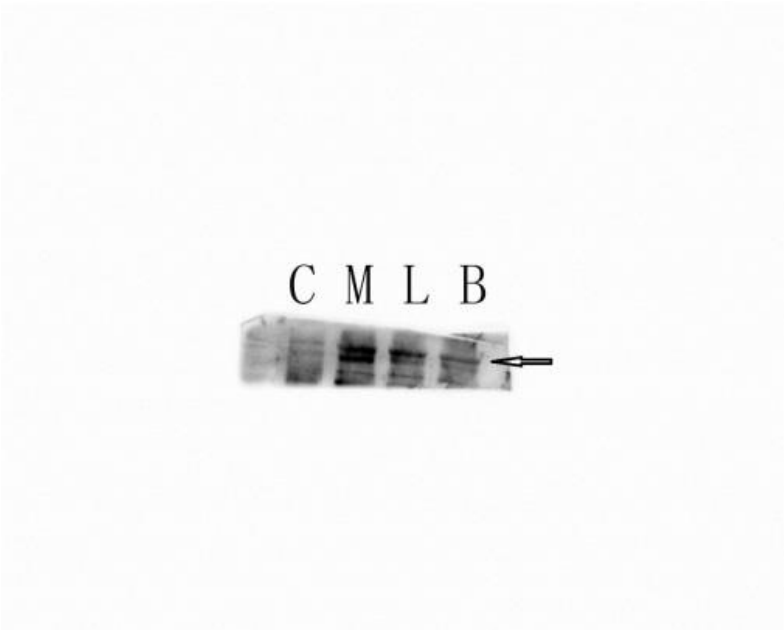

11. The full-length gels: Fig.10-ACE2

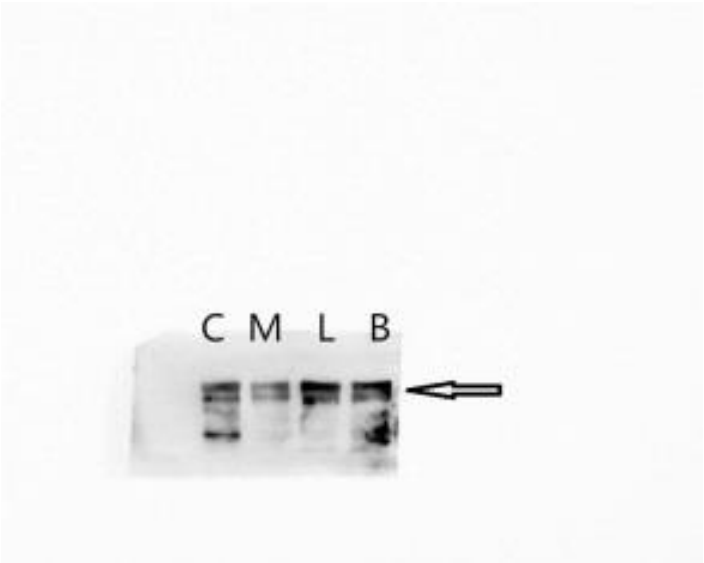

12. The full-length gels: Fig.10-ACE ACE2(  $\beta$  -actin )

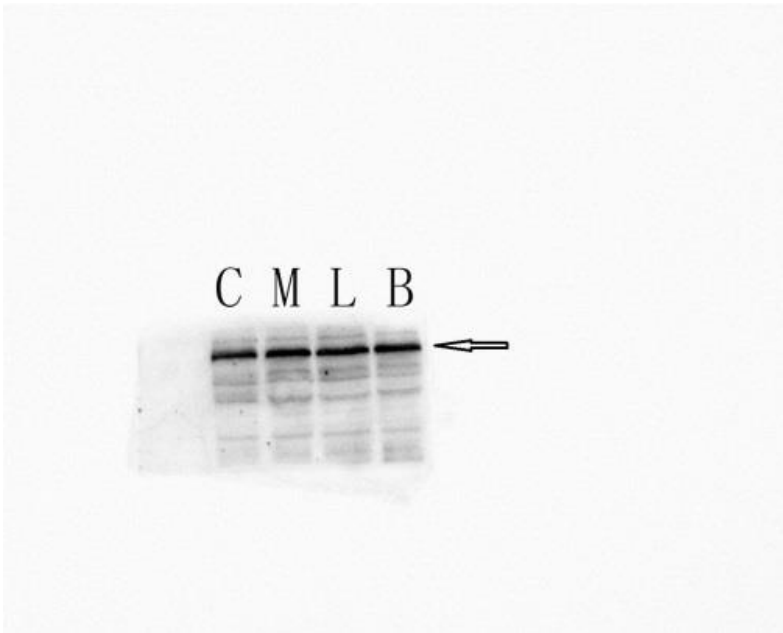

**13. The full-length gels:** Fig.10-Ang 2

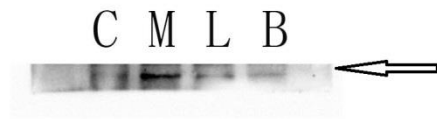

**14. The full-length gels: Fig.10-Ang 2( $\beta$ -actin)**

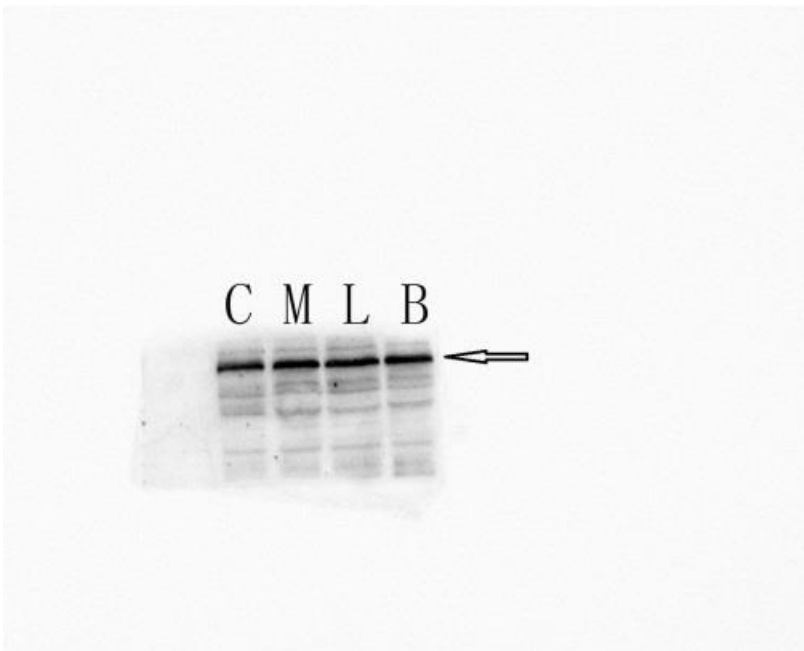

**15. The full-length gels: Fig.10-MAS**



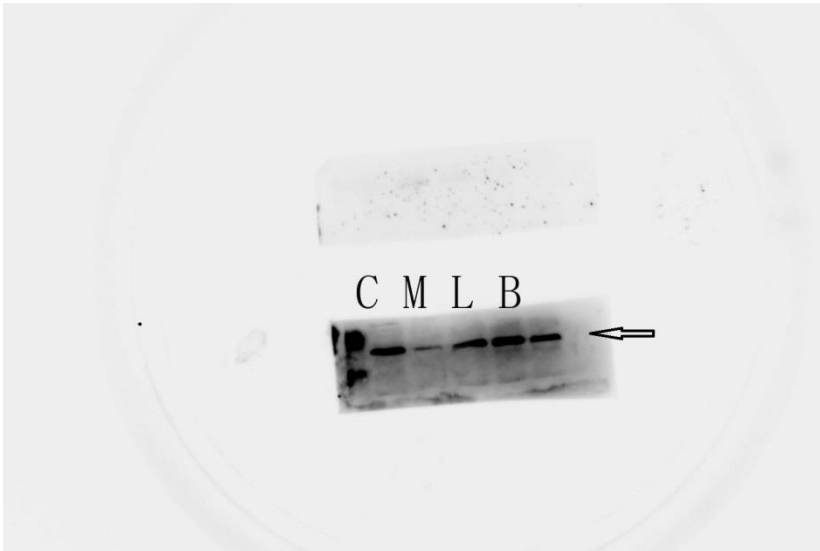

**16. The full-length gels: Fig.10-MAS (  $\beta$  -actin)**

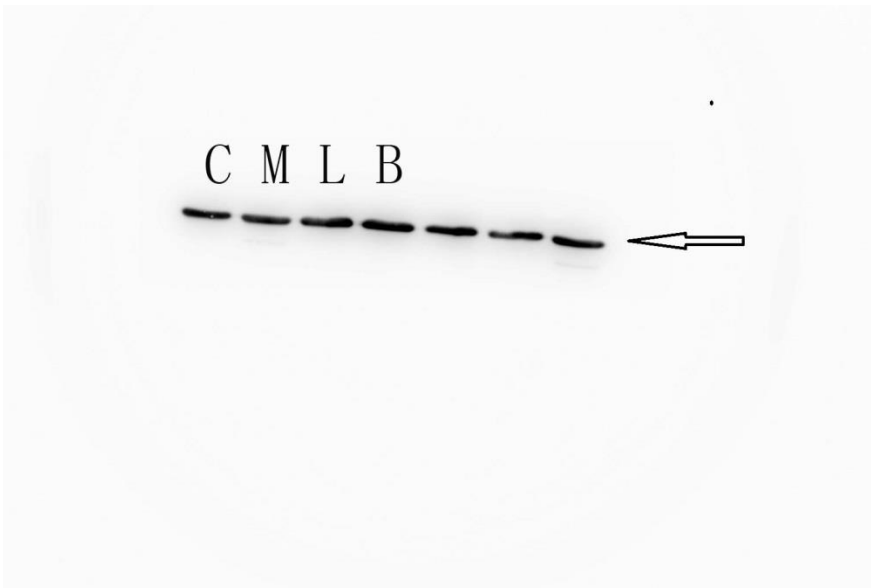

**17. The full-length gels: Fig.11-LXR- $\alpha$**

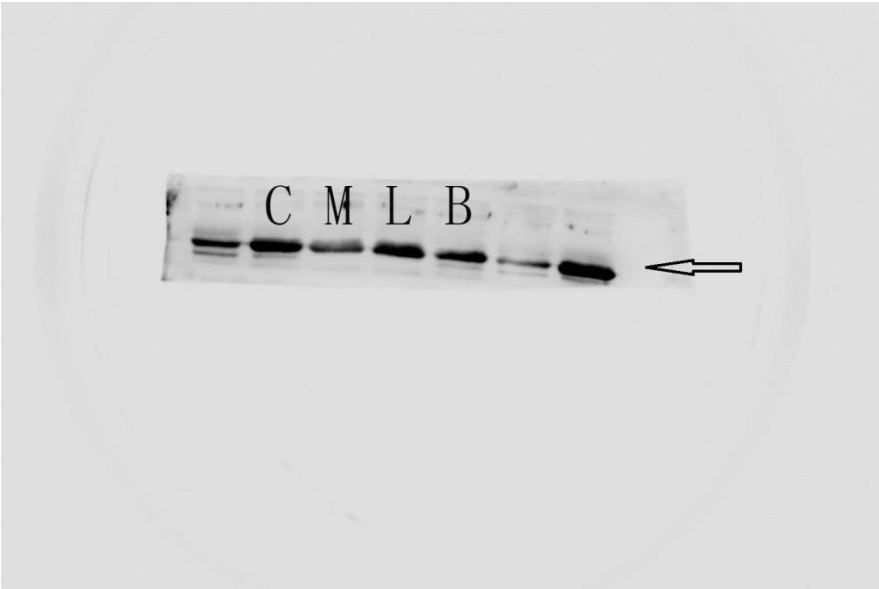

18. The full-length gels: Fig.11-LXR- $\alpha$  ( $\beta$ -actin)

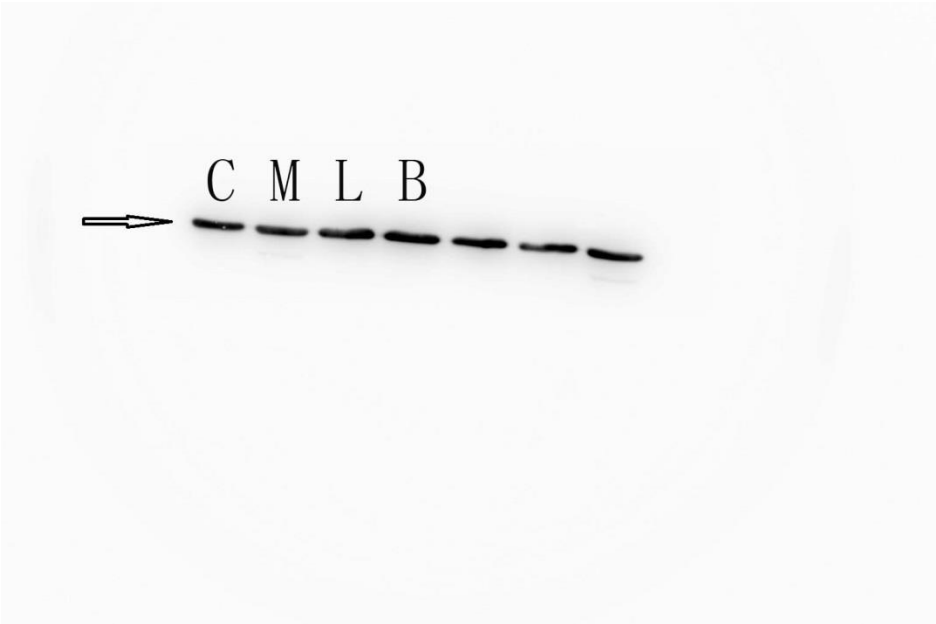

Supplement: srep40523-s1.pdf [file srep40523-s1.pdf]
